# Supplementary material for: Dogs are the main species involved in animal-vehicle collisions in southern Spain: Daily, seasonal and spatial analyses of collisions
Source: PubMed Central journal article supplement (PMC6157827; doi:10.1371/journal.pone.0203693), 2018-09-14
Supplement: pone.0203693.s001.pdf [file pone.0203693.s001.pdf]

## SUPPORTING INFORMATION

**S1 Table.** Species involved in animal-vehicle collisions reported to authorities in the province of Seville (Spain) in the years 2014 and 2015. Collision data were provided by the Provincial Directorate of Traffic of Seville (DGT).

| Species                       | Common name     | Number of collisions |
|-------------------------------|-----------------|----------------------|
| <i>Canis familiaris</i>       | Domestic dog    | 399                  |
| <i>Equus caballus</i>         | Horse           | 33                   |
| <i>Ovis aries</i>             | Domestic sheep  | 13                   |
| <i>Sus scrofa</i>             | Wild boar       | 17                   |
| <i>Felis silvestris catus</i> | Domestic cat    | 8                    |
| <i>Cervus elaphus</i>         | Red deer        | 6                    |
| <i>Vulpes Vulpes</i>          | Red fox         | 5                    |
| <i>Bos taurus</i>             | Cow             | 4                    |
| <i>Capra sp</i>               | Goat            | 4                    |
| <i>Birds</i>                  | --              | 2                    |
| <i>Oryctolagus cuniculus</i>  | European rabbit | 2                    |
| <i>Lepus sp.</i>              | Hare            | 1                    |
| <i>Lynx pardinus</i>          | Iberian lynx    | 1                    |
| <i>Meles meles</i>            | European badger | 1                    |
