# Supplementary material for: Dogs are the main species involved in animal-vehicle collisions in southern Spain: Daily, seasonal and spatial analyses of collisions
Source: PubMed Central journal article supplement (PMC6157827; doi:10.1371/journal.pone.0203693), 2018-09-14

## SUPPORTING INFORMATION

**S1 Fig.**

a)

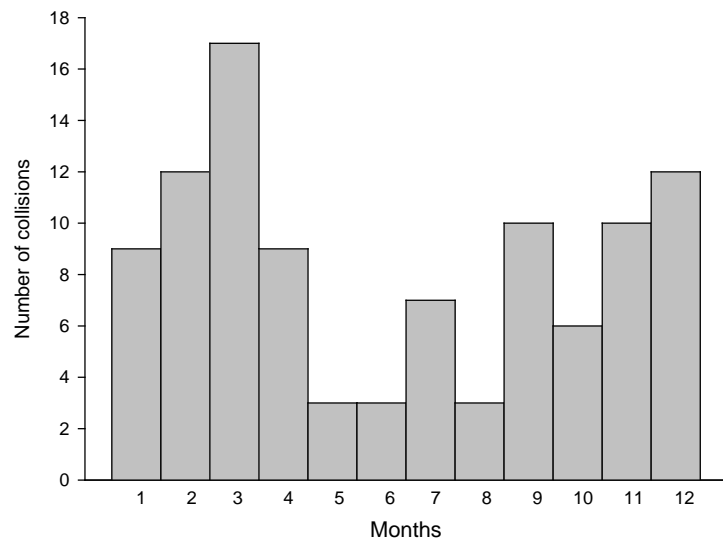

b)

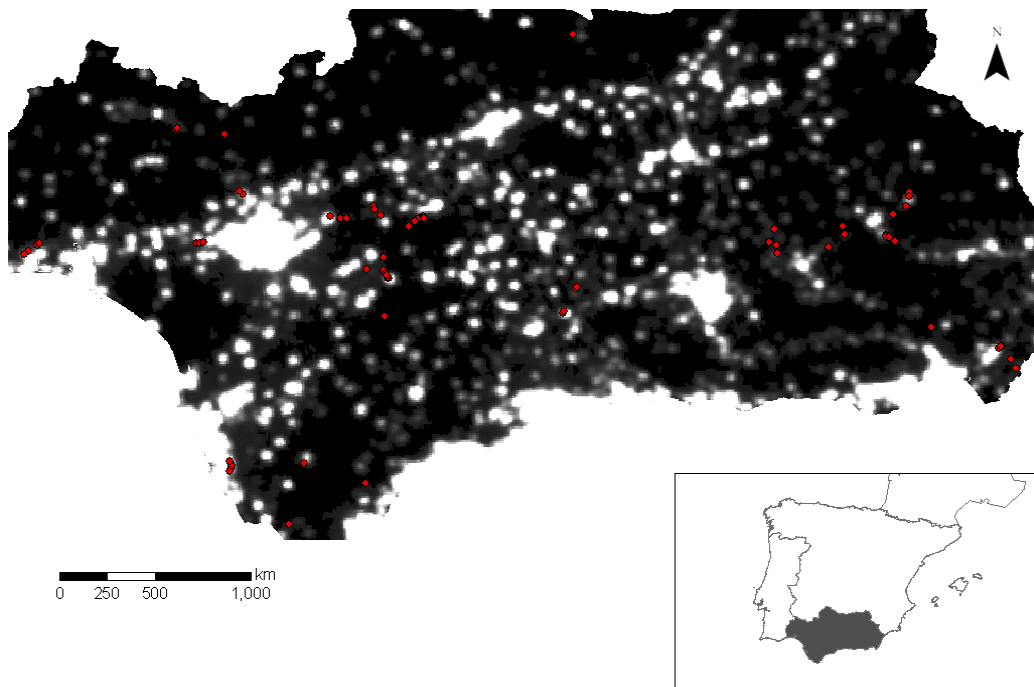

Supplement: pone.0203693.s002.pdf [file pone.0203693.s002.pdf]
